# Supplementary material
Source: PubMed Central journal article supplement (PMC8652677)
Supplement: ADHM-10-0-s001.pdf [file ADHM-10-0-s001.pdf]

# ADVANCED HEALTHCARE MATERIALS

## Supporting Information

for *Adv. Healthcare Mater.*, DOI: 10.1002/adhm.202101370

A modular biomaterial scaffold-based vaccine elicits durable adaptive immunity to subunit SARS-CoV-2 antigens

*Fernanda Langellotto<sup>1</sup>, Maxence O. Dellacherie<sup>1,2</sup>, Chyenne Yeager<sup>1</sup>, Hamza Ijaz<sup>1</sup>, Jingyou Yu<sup>3</sup>, Chi-An Cheng<sup>1,6,7</sup>, Nikolaos Dimitrakakis<sup>1</sup>, Benjamin T. Seiler<sup>1</sup>, Makda S. Gebre<sup>3</sup>, Tal Gilboa<sup>1,6,7</sup>, Rebecca Johnson<sup>8</sup>, Nadia Storm<sup>8</sup>, Sarai Bardales<sup>1</sup>, Amanda Graveline<sup>1</sup>, Des White<sup>1</sup>, Christina M. Tringides<sup>1,9,10</sup>, Mark J. Cartwright<sup>1</sup>, Edward J. Doherty<sup>1</sup>, Anna Honko<sup>8</sup>, Anthony Griffiths<sup>8</sup>, Dan H. Barouch<sup>3,4,5</sup>, David R. Walt<sup>1, 6,7</sup>, David J. Mooney<sup>1,2, \*</sup>*

## Supporting Information

### **A rapidly adaptable biomaterial vaccine for SARS-CoV-2**

Fernanda Langellotto<sup>1†</sup>, Maxence O. Dellacherie<sup>1,2†</sup>, Chyenne Yeager<sup>1†</sup>, Hamza Ijaz<sup>1</sup>, Jingyou Yu<sup>3</sup>, Chi-An Cheng<sup>1,6,7</sup>, Nikolaos Dimitrakakis<sup>1</sup>, Benjamin T. Seiler<sup>1</sup>, Makda S. Gebre<sup>3</sup>, Tal Gilboa<sup>1,6,7</sup>, Rebecca Johnson<sup>8</sup>, Nadia Storm<sup>8</sup>, Sarai Bardales<sup>1</sup>, Amanda Graveline<sup>1</sup>, Des White<sup>1</sup>, Christina M. Tringides<sup>1,9,10</sup>, Mark J. Cartwright<sup>1</sup>, Edward J. Doherty<sup>1</sup>, Anna Honko<sup>8</sup>, Anthony Griffiths<sup>8</sup>, Dan H. Barouch<sup>3,4,5</sup>, David R. Walt<sup>1,6,7</sup>, David J. Mooney<sup>1,2,\*</sup>

† These authors contributed equally to this work

#### *List of supplementary figures and tables*

**Figure S1:** photographs of explanted scaffolds

**Figure S2:** anti-N, S1, S2 protein IgG, IgG1 and IgG2a antibodies measured by Simoa technology

**Figure S3:** anti-N, S1, and S2 protein IgG2b, IgM and IgA antibodies measured by Simoa technology

**Figure S4:** Schematics for “add-in-time” vaccine

**Figure S5:** Results from SARS-CoV2 plaque reduction assay

**Figure S6:** Primary Flow Cytometry gating for specific T cell restimulation assay

**Table S1:** Physical characteristics of MSR particles used for vaccination obtained by SEM image analysis.

MSR

N/S1/S2 MSR

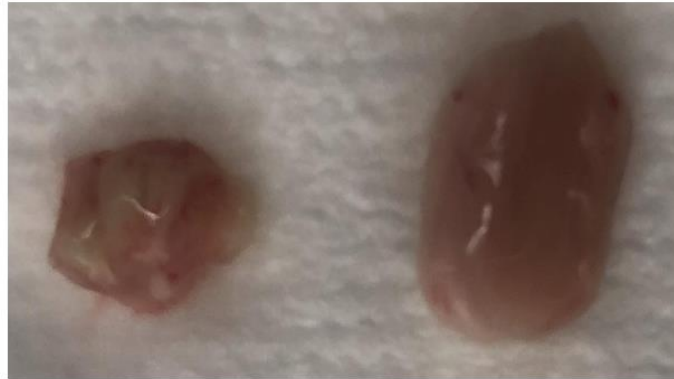

**Figure S1: photographs of explanted scaffolds** containing only MSR (MSR) or the full SARS-COV-2 MSR vaccine formulated with 1 $\mu$ g of each antigen (N, S1 and S2), 25 $\mu$ g MPLA and 1 $\mu$ g GM-CSF

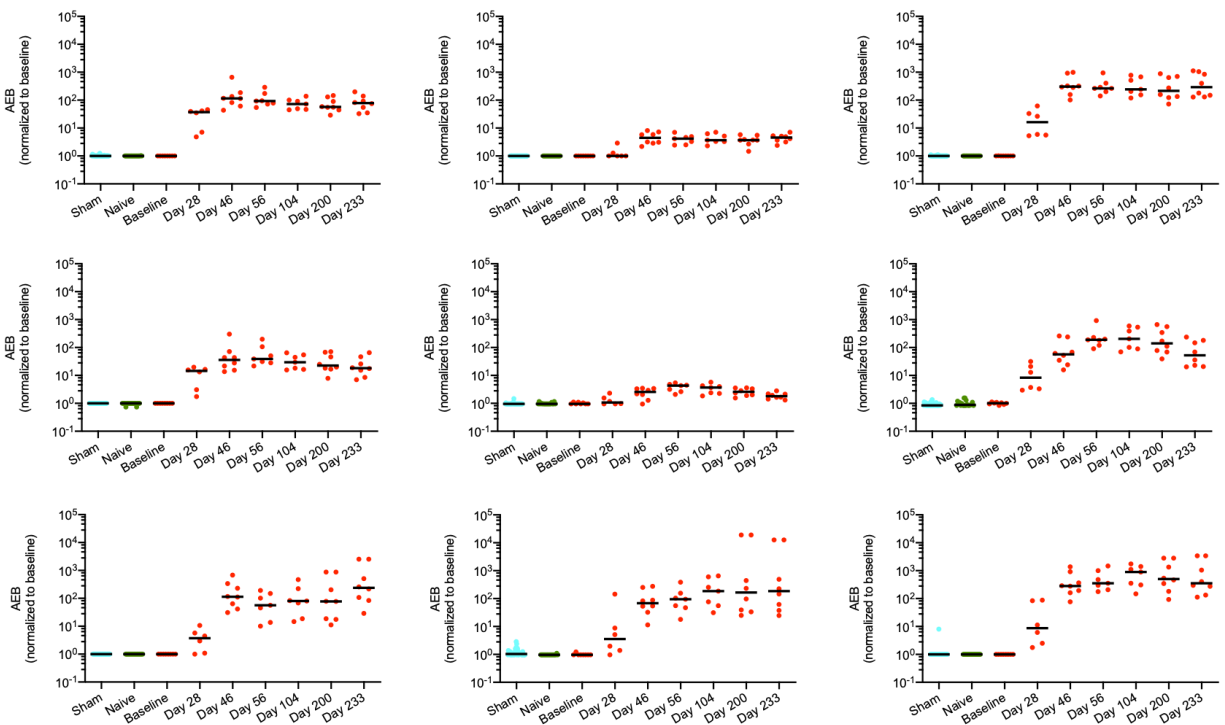

**Figure S2: anti - N, S1, S2 protein IgG, IgG1 and IgG2a antibodies measured by Simoa technology.** Normalized average number of enzyme labels per bead (AEB) of – from left to right – N, S1, S2-specific antibodies of the – from top to bottom – IgG, IgG1 and IgG2a isotypes.

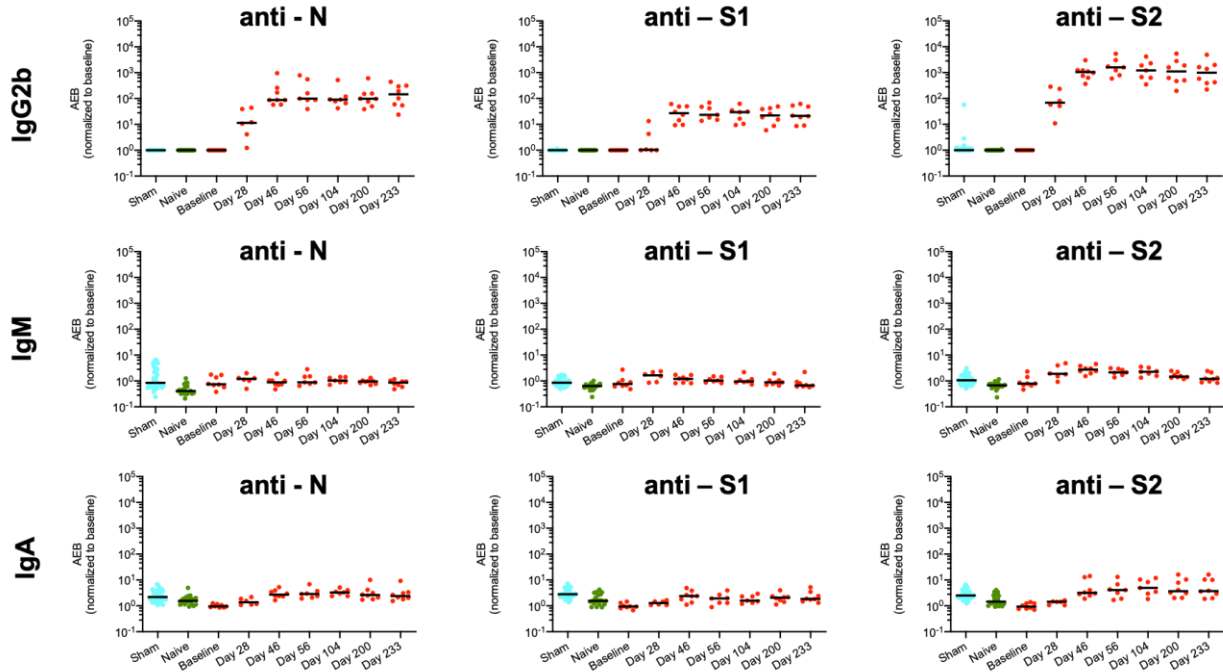

**Figure S3: anti - N, S1, and S2 protein IgG2b, IgM and IgA antibodies measured by Simoa technology.** Normalized average number of enzyme labels per bead (AEB) of – from left to right – N, S1, S2-specific antibodies of the – from top to bottom – IgG2b, IgM and IgA isotypes.

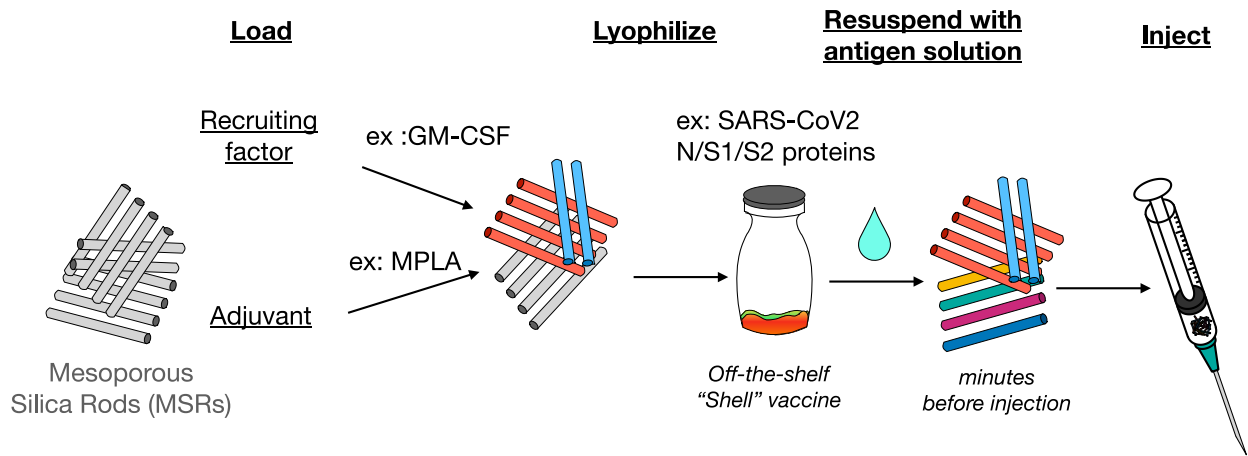

**Figure S4: Schematics for “add-in-time” vaccine.** Alternatively, an MSR vaccine “Shell” vaccine can be manufactured by solely loading a recruiting factor and adjuvant before lyophilization and storage. Antigen is added “in-time” by resuspending the powder-form MSR vaccine with an antigen solution minutes before injection.

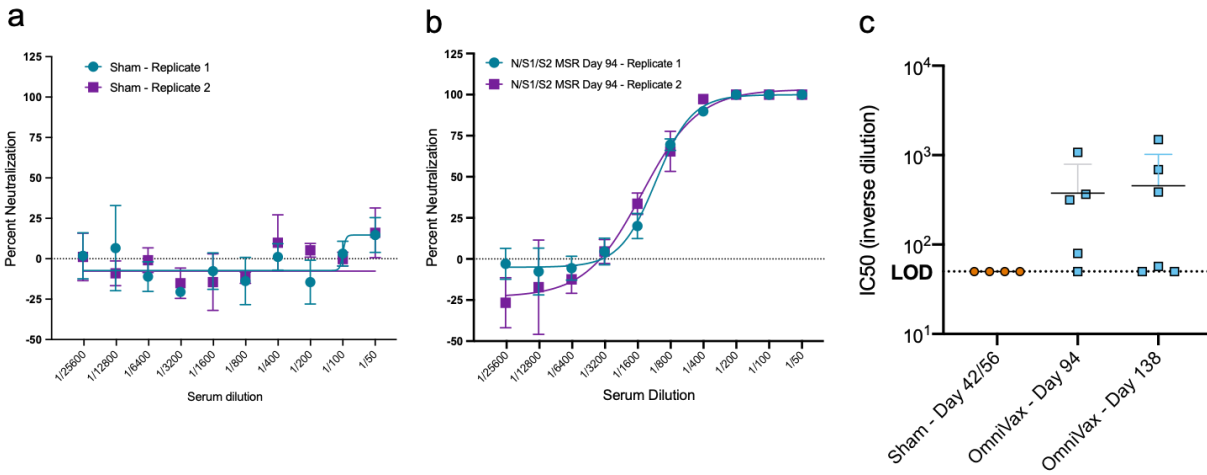

**Figure S5: Results from SARS-CoV-2 plaque reduction assay.** Plaque reduction (% neutralization) vs serum dilution and its non-linear-fit (full line) used to calculate IC50 is shown for a representative Sham (a) and N/S1/S2 MSR vaccine samples (b). The average of two replicates was used for each sample to determine the IC50 dilution. (c) IC50 from serum of Sham or N/S1/S2 MSR vaccine – immunized mice.

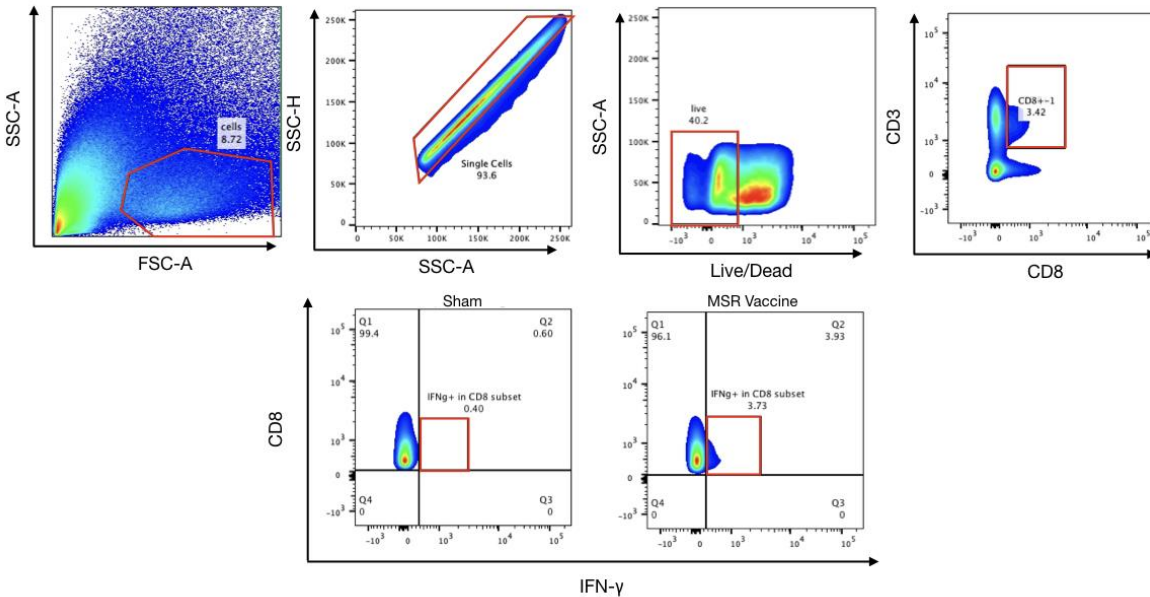

**Figure S6: Primary Flow Cytometry gating for specific T cell restimulation assay.** Representative flow data gating CD8<sup>+</sup> T-cell in splenocytes 28 days after immunization with the MSR vaccine loaded with N/S1/S2 proteins. Gated on live cells.

| Number of particles measured | Particle size range ( $\mu\text{m}$ ) | Average particle length ( $\mu\text{m}$ ) | Median particle length ( $\mu\text{m}$ ) | Surface area ( $\text{m}^2/\text{g}$ ) | Average pore diameter (nm) | Pore volume ( $\text{cm}^3/\text{g}$ ) |
|------------------------------|---------------------------------------|-------------------------------------------|------------------------------------------|----------------------------------------|----------------------------|----------------------------------------|
| 907                          | 20-403                                | 65                                        | 56                                       | 361.9                                  | 6.51                       | 0.589                                  |

**Table S1: Physical characteristics of MSR particles used for vaccination obtained by SEM image analysis and nitrogen sorption analysis**
